# Supplementary material for: Ultrathin Ni1−xCoxS2 nanoflakes as high energy density electrode materials for asymmetric supercapacitors
Source: publisher site journal article supplement (doi:10.3762/bjnano.10.213), 2019-11-11
Supplement: Additional file 1 [file 2190-4286-10-213-S1.pdf]

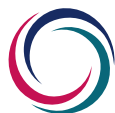

## Supporting Information

for

### **Ultrathin $\text{Ni}_{1-x}\text{Co}_x\text{S}_2$ nanoflakes as high energy density electrode materials for asymmetric supercapacitors**

Xiaoxiang Wang, Teng Wang, Rusen Zhou, Lijuan Fan, Shengli Zhang, Feng Yu, Tuquabo Tesfamichael, Liwei Su and Hongxia Wang

*Beilstein J. Nanotechnol.* **2019**, *10*, 2207–2216. doi:10.3762/bjnano.10.213

## Additional figures

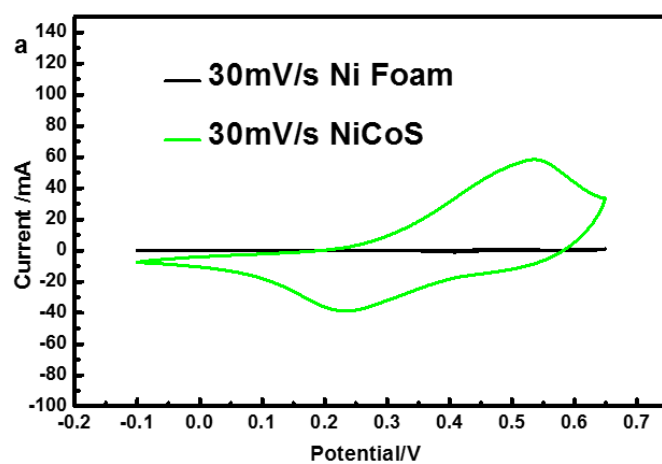

**Figure S1:** CV (vs Hg/HgO) comparison of bare Ni foam and  $\text{Ni}_{1-x}\text{Co}_x\text{S}_2$ .

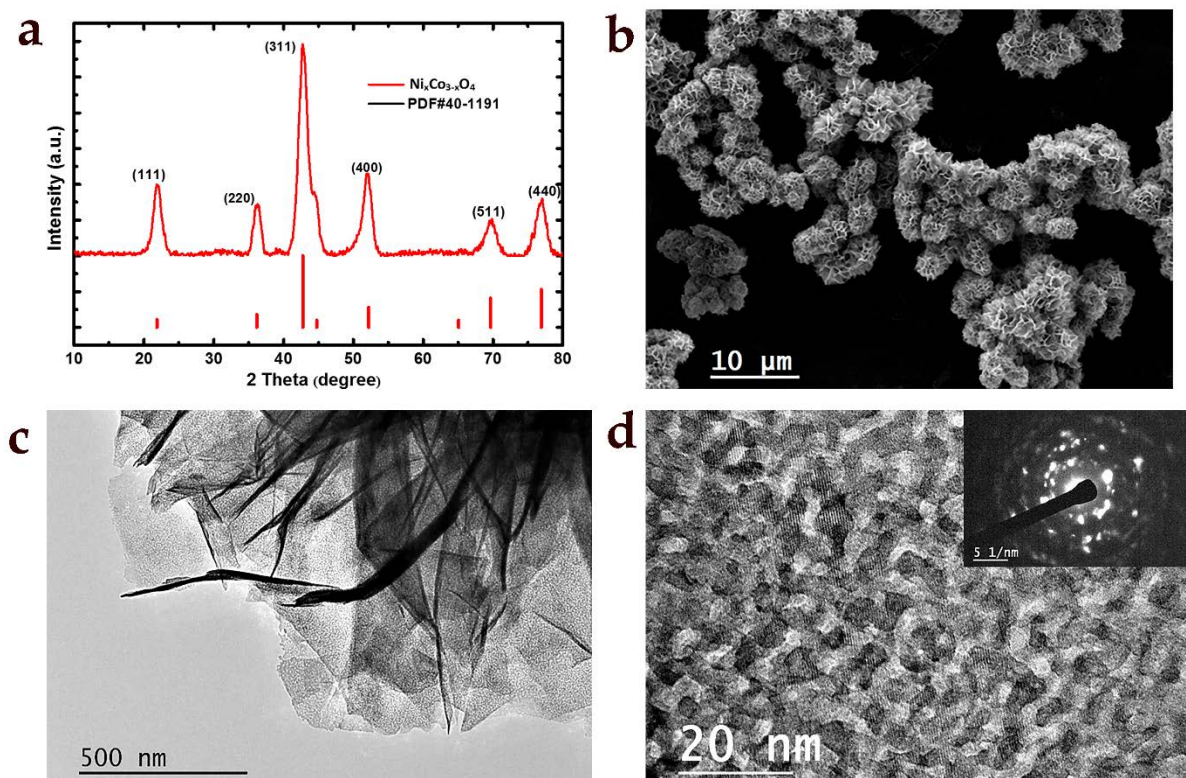

**Figure S2:** (a) XRD pattern of  $\text{Ni}_{1.7}\text{Co}_{1.3}\text{O}_4$  materials; (b) FESEM images of  $\text{Ni}_{1.7}\text{Co}_{1.3}\text{O}_4$ ; (c and d) Low magnification and enlarged TEM images of precursor  $\text{Ni}_{1.7}\text{Co}_{1.3}\text{O}_4$ , the inset shows the SAED pattern of the materials.

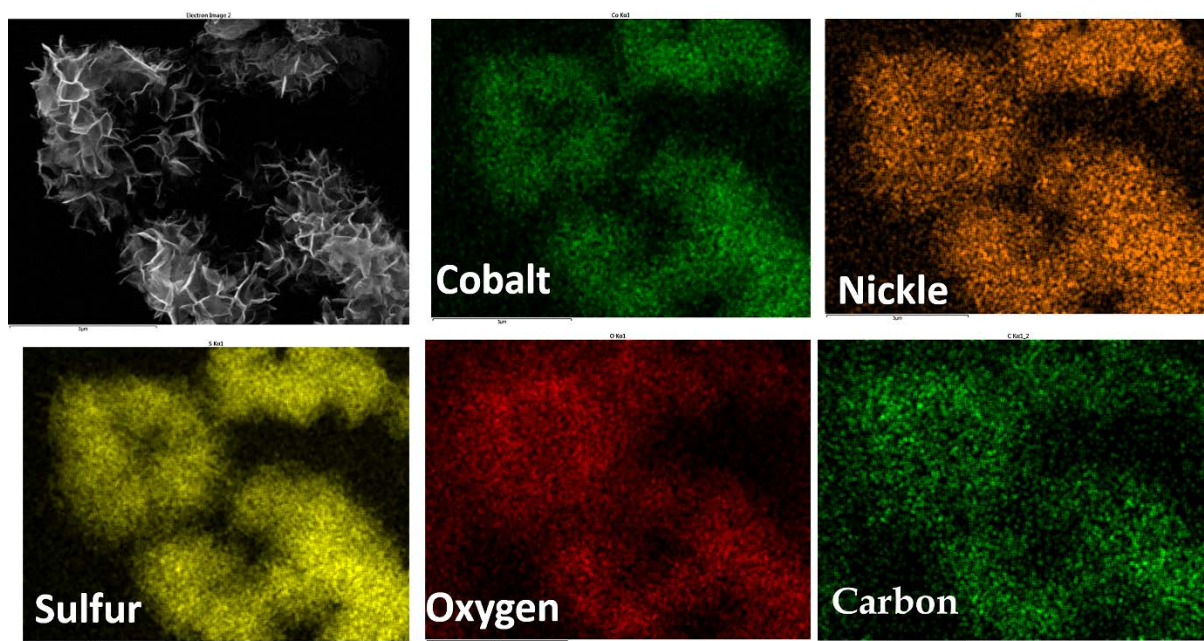

**Figure S3:** FESEM-EDS mapping of elements in  $\text{Ni}_{1-x}\text{Co}_x\text{S}_2$  nano particles.

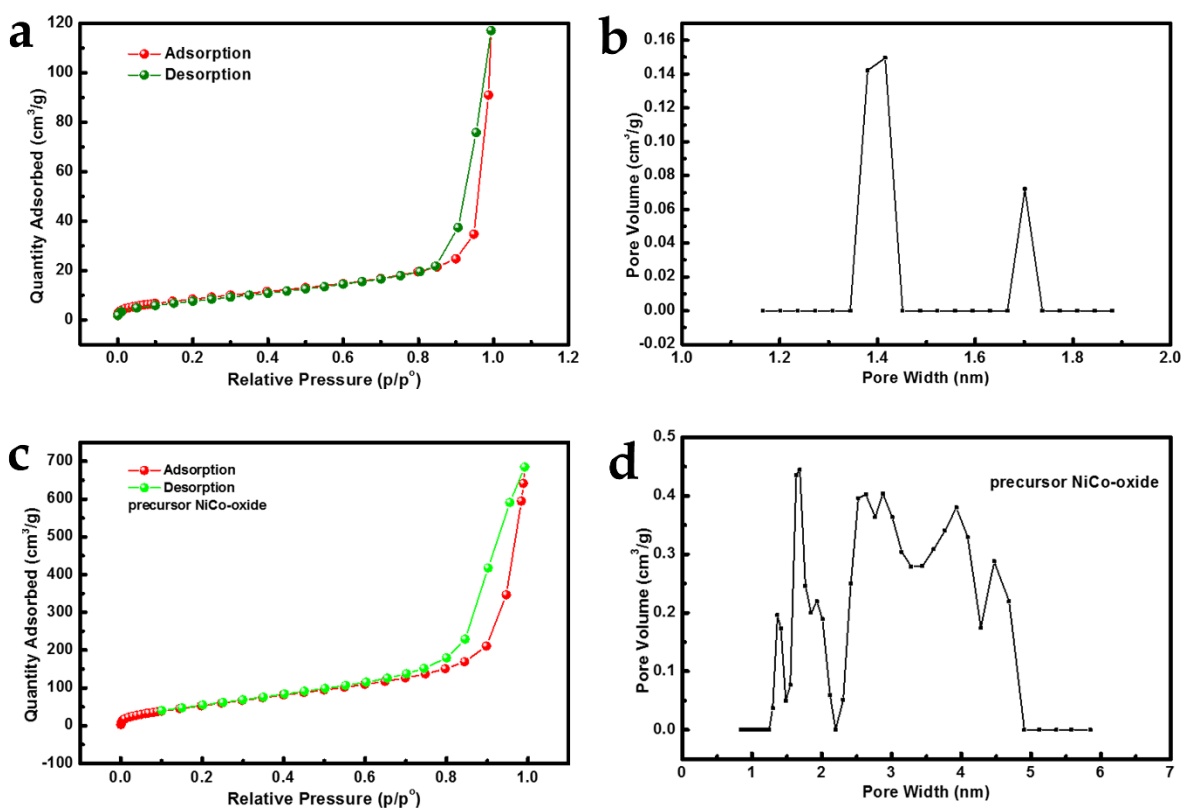

**Figure S4:** a) N<sub>2</sub> adsorption/desorption isotherms and b) pore size distribution plot of  $\text{Ni}_{1-x}\text{Co}_x\text{S}_2$  materials; c) N<sub>2</sub> adsorption/desorption isotherms and d) pore size distribution plot of  $\text{Ni}_{1.7}\text{Co}_{1.3}\text{O}_4$  materials.

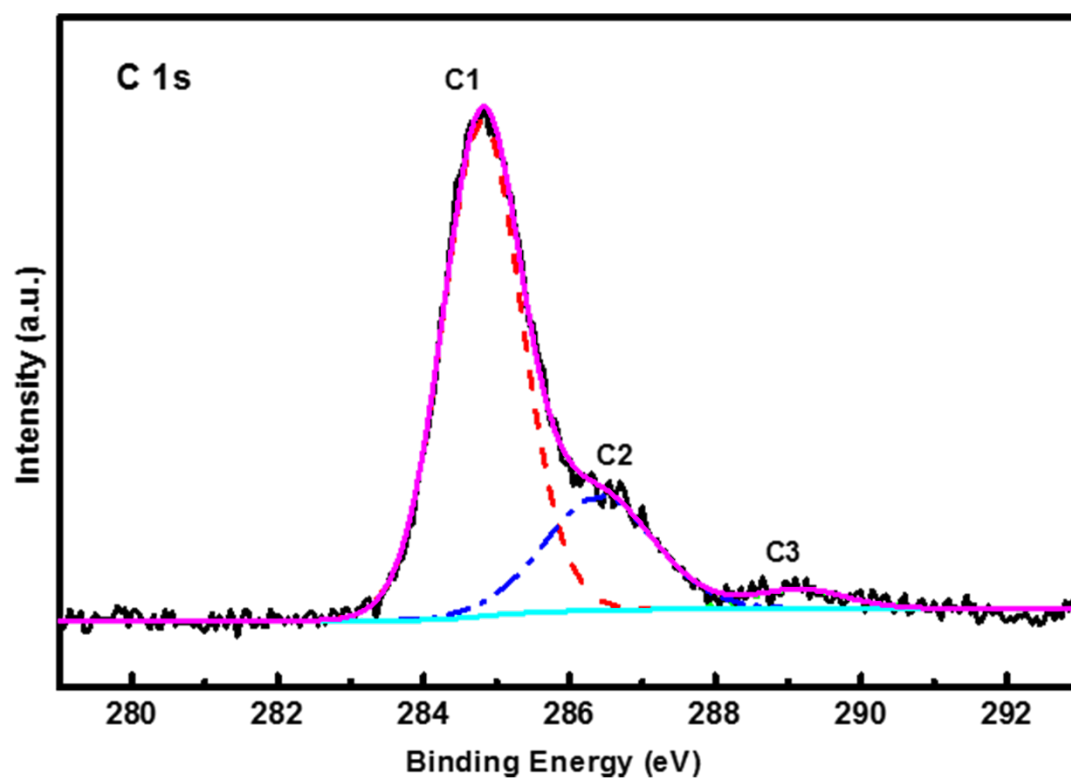

**Figure S5:** High-resolution XPS spectra C 1s of the Ni<sub>1-x</sub>Co<sub>x</sub>S<sub>2</sub> nanoflakes.

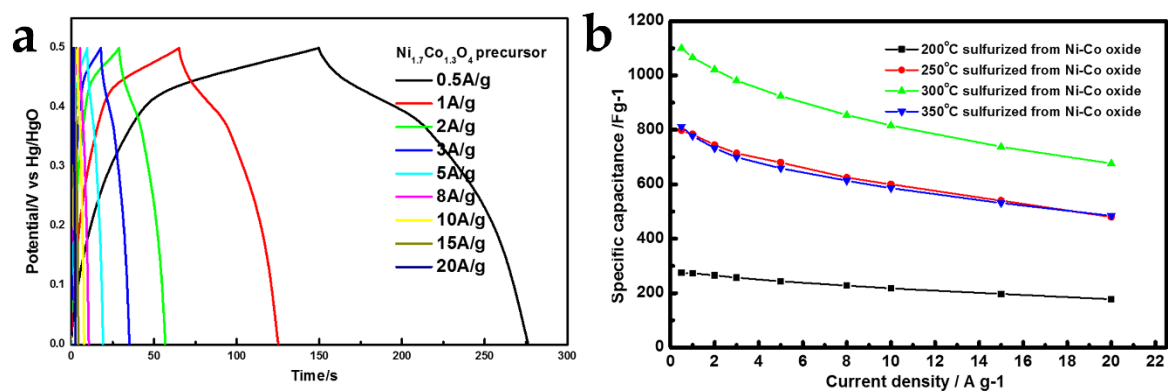

**Figure S6:** (a) GCD curves of  $\text{Ni}_{1.7}\text{Co}_{1.3}\text{O}_4$  materials; (b) Specific capacitance comparison of different sulfurization temperature.

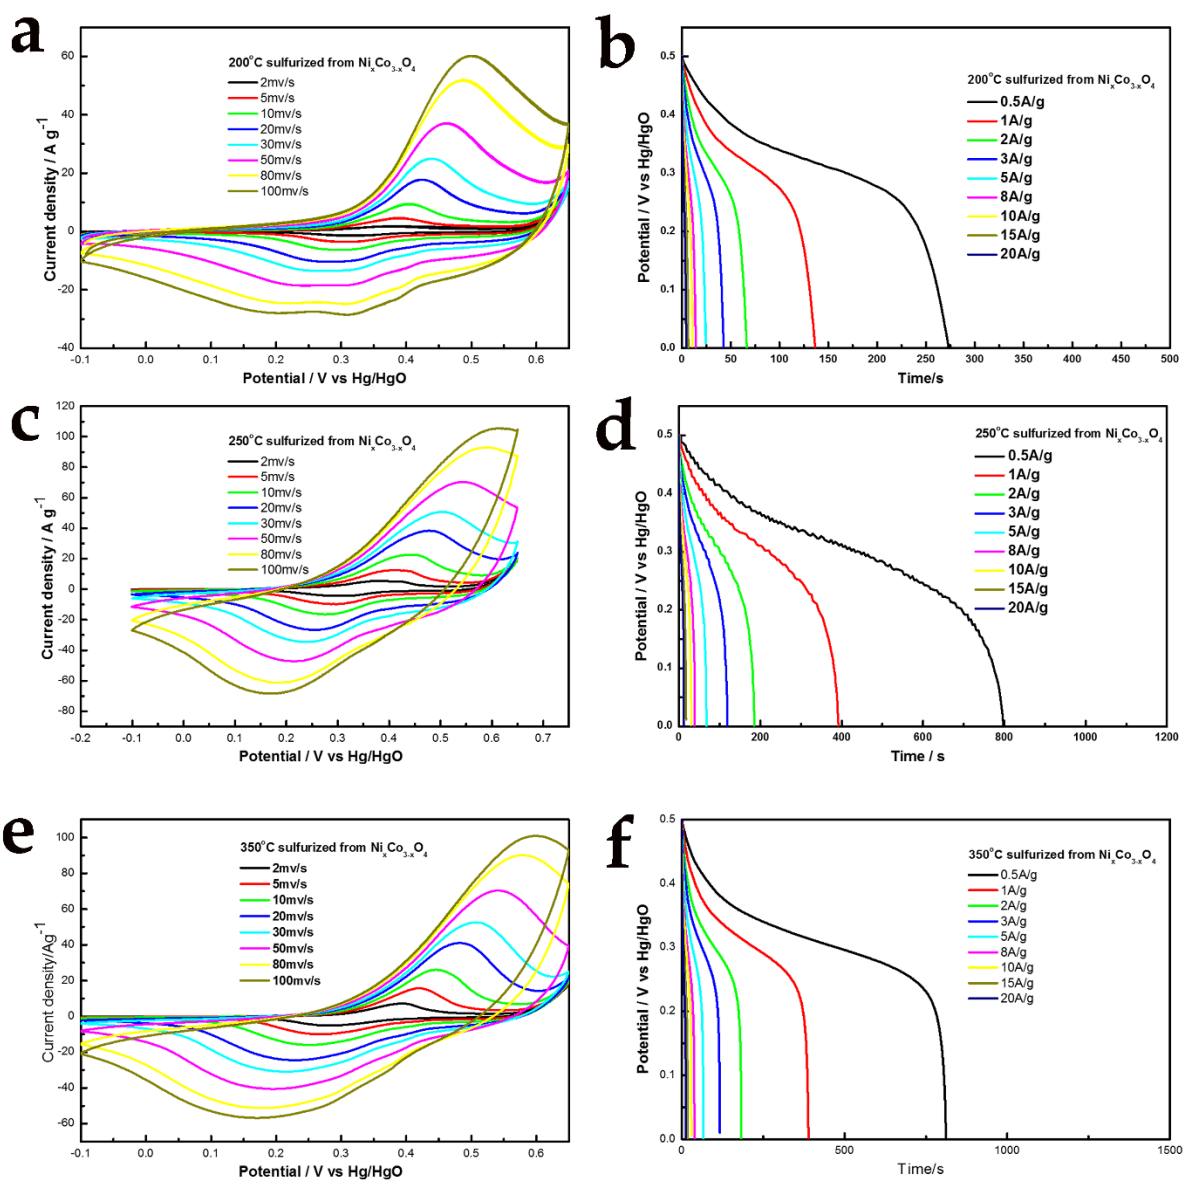

**Figure S7:** CV and GCD plots (vs Hg / HgO) of  $\text{Ni}_{1-x}\text{Co}_x\text{S}_2$  sulfured under different temperature of 200 °C (a,b); 250 °C (c,d) and 350 °C (e,f).



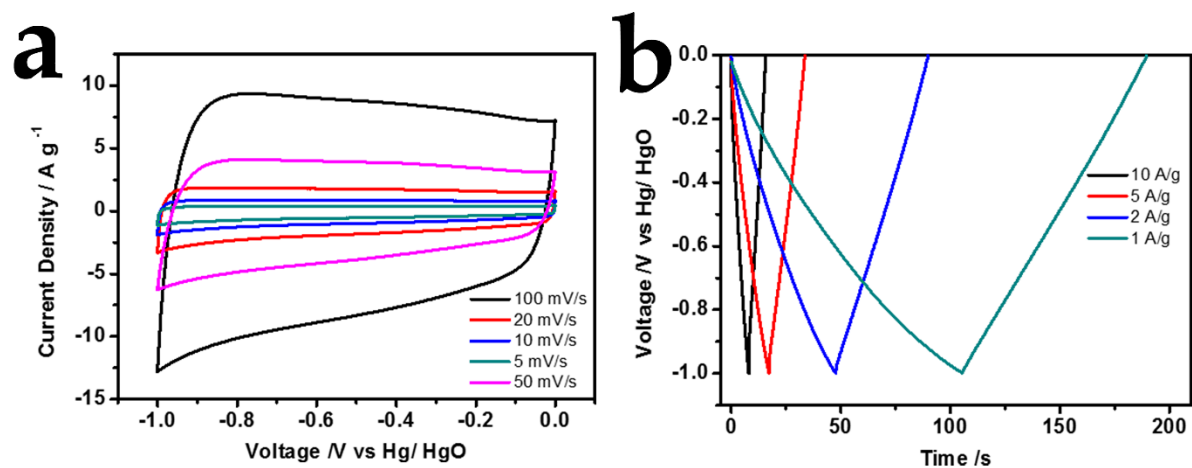

**Figure S8:** (a) CV and (b) GCD plots (vs  $\text{Hg/HgO}$ ) of negative material YP-50F commercial carbon.
